**A-1137** Room G, 10/16/2000 9:00 AM - 11:00 AM (PS)  
**Stability Studies of Propofol Intravenous Emulsions** *Clive Washington, Ph.D.; Stanley S. Davis, Ph.D.; Jibong Han, M.Sc., Pharmaceutical Sciences, University of Nottingham, Nottingham, Notts., United Kingdom.* In comparing the stability of Diprivan and Propofol IV Emulsion, Propofol Emulsion was significantly less stable than Diprivan after shaking & freezing, possibly due to the differences in pH and additives.

**A-1138** Room G, 10/16/2000 9:00 AM - 11:00 AM (PS)  
**Perioperative Morbidity and Mortality Following Endoluminal Treatment of Infrarenal Abdominal Aortic Aneurysms (AAA)** *Leila Yakbou, MD; Jean Claude Merle, MD; Alexandre D'Audiffret, MD; Jean Pierre Becquemin, MD; Philippe Duvaldestin, MD, Anesthesiology, Henri Mondor Hospital, Creteil, Val De Marne, France.* The endoluminal AAA treatment was associated with less morbidity and hospital stay.

### Anesthetic History & Patient Safety

**A-1139** Room G, 10/17/2000 9:00 AM - 11:00 AM (PS)  
**Resuscitation and Revival: The History of Intraosseous Injections and Infusions - Emergency Access to the Circulation** *Kamayni Agarwal, M.D.; Goerig Michael, M.D., Department of Anesthesiology, University-Hospital Eppendorf, Hamburg, Germany.* Intraosseous cannulation, first described in 1922, was revived over the past decades. Drugs and infusions may be applied in cases of emergency.

**A-1140** Room G, 10/17/2000 9:00 AM - 11:00 AM (PS)  
**Hunter Holmes McGuire and John Julian Chisolm - Anaesthetists Par Excellence** in the Confederate Army during the Civil War *Maurice S. Albin, M.D., Anesthesiology, U.T.H.S.C., San Antonio, TX, United States.* Hunter McGuire and John Chisolm Anaesthetists *Par Excellence* in the Confederate Army During The Civil War.

**A-1141** Room G, 10/17/2000 9:00 AM - 11:00 AM (PS)  
**The Medical and Surgical History of the War of the Rebellion: A Monumental Medical Treatise - Anesthetic Aspects** *Maurice S. Albin, M.D., Anesthesiology, UTHSC, San Antonio, TX, United States.* The Medical and Surgical History of the War of the Rebellion: A Monumental Medical Treatise - Anesthetic Aspects.

**A-1142** Room G, 10/17/2000 9:00 AM - 11:00 AM (PS)  
**Renal Responses to General Anesthesia with Propofol in Patients** *Shabbaz R. Arain, MD; Thomas J. Ebert, MD, PhD, Anesthesiology, Medical College of Wisconsin and VA Med Ctr, Milwaukee, WI, United States.* This study shows that postop albuminuria, proteinuria and glucosuria are common in surgical patients despite anesthetic agent. Thus, nonanesthetic factors may cause abnormal urine values.

**A-1143** Room G, 10/17/2000 9:00 AM - 11:00 AM (PS)  
**US Army Anesthesia in the Philippines, 1940-45: An Example of the Effect of World War II on the Development of Modern Anesthesiology** *Selma H. Calmes, MD, Anesthesiology, Olive View-UCLA Medical Center, Sylmar, CA, United States.* This study shows how US Army anesthesia rapidly changed during WW II in one war area. This shows the background for the development of modern anesthesiology.

**A-1144** Room G, 10/17/2000 9:00 AM - 11:00 AM (PS)  
**Identification of Safety Issues in Post-Operative Patient Controlled Analgesia Using Systematic Follow up** *Vanessa Cartier, MD; Philippe Garnerin, DVM; Francois Clergue, MD, Division of Anesthesiology, Geneva University Hospitals, Geneva, Switzerland.* Systematic follow-up of patients under PCA allows identification of medication process errors associated to potential or actual adverse events

**A-1145** Room G, 10/17/2000 9:00 AM - 11:00 AM (PS)  
**Mass Spectrometry and Anesthesia** *Brian Chamblee, M.D.; Gary Vasdev, M.D.; Fernando Zepeda, M.D.; Peter Southorn, M.D., Anesthesiology, Mayo Clinic, Rochester, MN, United States.* One of the greatest advances in physics was the discovery of mass spectrometry. This has revolutionized patient safety under anesthesia. The early historical development of clinical mass spectrometry is presented.

**A-1146** Room G, 10/17/2000 9:00 AM - 11:00 AM (PS)  
**Predictive Factors for Recurrent PONV Following Single Drug Treatment** *Pierre A. Diemunsch, M.D.; Christian Conseiller, M.D.; Nathalie Clyti, Ph.D.; Jean P. Mamet, Anesthesiology, CHU, Strasbourg, France.* The predictive factors for recurrence of PONV after primary treatment with a single antiemetic are: female gender, history of PONV, post-op morphinic analgesia and premedication with a BZD.

**A-1147** Room G, 10/17/2000 9:00 AM - 11:00 AM (PS)  
**Evaluation of Pneumoperitoneal Renewal to Prevent N<sub>2</sub>O Accumulation in the Pneumoperitoneum during Laparoscopy** *Pierre A. Diemunsch, M.D.; Thomas Van Dorsselaer; Roland Schaeffer, M.D.; Jacques Marescaux, M.D., Anesthesiology, IRCAD, CHU, Strasbourg, France.* During laparoscopy, a 12 L per hour renewal of the pneumoperitoneum is enough to prevent its significant contamination with N<sub>2</sub>O.

**A-1148** Room G, 10/17/2000 9:00 AM - 11:00 AM (PS)  
**The Crimean War (1854-1855): First Use of Mass Anesthesia under Military Field Conditions** *Guillaume Fevre, MD; Philippe Juvin, MD; Caroline Chabine, MD; Jean J. Ferrandis, MD; Jean M. Desmots, MD, Anesth.Dpt., Bicbat Hosp., Paris, France.* We have reported the use of anesthesia during the Crimean War which was the first example of large scale anesthetic use under military field conditions.

**A-1149** Room G, 10/17/2000 9:00 AM - 11:00 AM (PS)  
**Influence of Conscious Sedation with Midazolam on Physiological Function and Their Recovery in the Elderly** *Tosbiaki Fujisawa, DDS, PhD; Nobuhito Kamekura, DDS; Kazuaki Fukushima, DDS, PhD; Osamu Kemmotsu, MD, PhD, Dept. Anesth., Dental Hosp. and Medical Hosp., Hokkaido University, Sapporo, Japan.* Midazolam decreases muscle power and dynamic balance in the elderly.

**A-1150** Room G, 10/17/2000 9:00 AM - 11:00 AM (PS)  
**Canister Tip Orientation and Residual Volume Have Significant Impact on the Dose of Benzocaine Administered by Spray** *Abmed Gbaleb, MD; K. Candido, MD; S. Saatee, MD; A. Khorasani, Anesthesiology & Pain Mgmt., Cook County Hospital, Chicago, IL, United States*
